# Supplementary material
Source: MDPI journal article supplement (https://www.mdpi.com/2076-3417/12/9/4342)
Supplement: s1 [file s1 › applsci-1649246-supplementary.pdf]

## Supplementary data

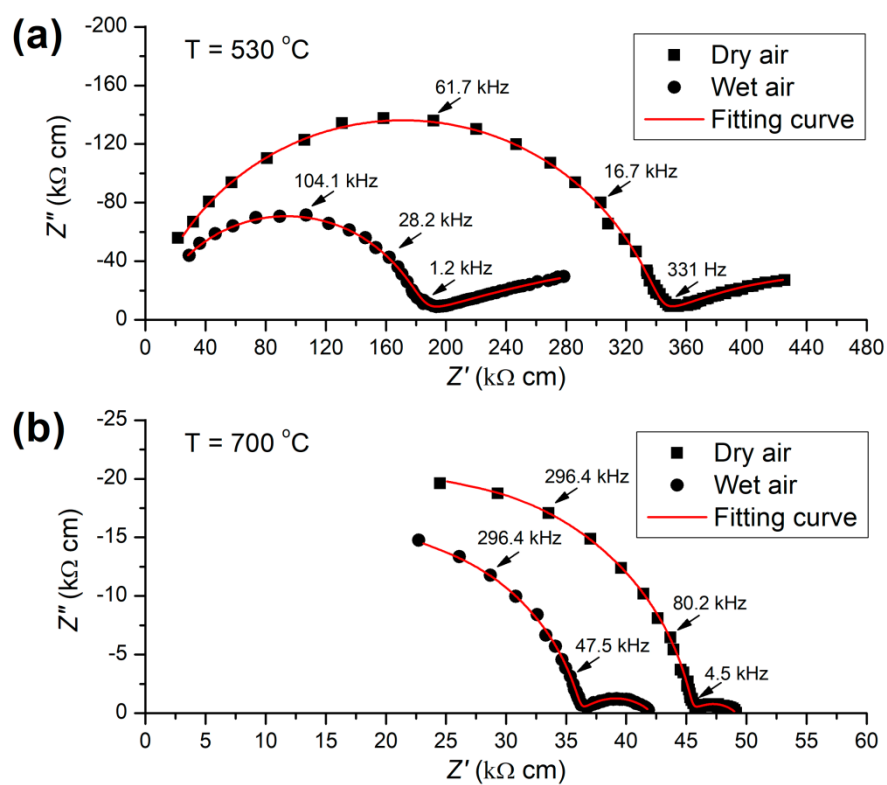

Figure S1. The impedance spectra of  $\text{La}_2(\text{Hf}_{2-x}\text{La}_x)\text{O}_{7-x/2}$  ( $x = 0.1$ ) at 530 and 700  $^{\circ}\text{C}$  in dry and wet air.
